# Supplementary material for: Factors associated with falls among older adults living in institutions
Source: PubMed Central journal article supplement (PMC3566955; doi:10.1186/1471-2318-13-6), 2013-01-15
Supplement: 1471-2318-13-6-S1.pdf [file 1471-2318-13-6-S1.pdf]

**Table.** Distribution of study subjects and proportion of residents with at least 1 fall, by study variables, among institutionalized older adults in Madrid, Spain.

| Grouping                    | No. (%) <sup>a</sup> | Fallers |      |           |
|-----------------------------|----------------------|---------|------|-----------|
|                             |                      | No.     | %    | 95% CI    |
| All                         | 733 (100)            | 90      | 12.4 | 9.4-15.5  |
| Sex                         |                      |         |      |           |
| Women                       | 408 (76)             | 52      | 12.5 | 9.4-16.5  |
| Men                         | 325 (24)             | 38      | 12.1 | 8.1-17.7  |
| Age (years)                 |                      |         |      |           |
| 65-74                       | 92 (12)              | 10      | 13.9 | 6.7-26.6  |
| 75-84                       | 301 (41)             | 31      | 10.3 | 7.3-14.3  |
| ≥ 85                        | 326 (47)             | 48      | 14.2 | 10.7-18.7 |
| Marital status              |                      |         |      |           |
| Spouse                      | 127 (15)             | 13      | 9.6  | 5.6-16.1  |
| No spouse                   | 576 (85)             | 75      | 13.1 | 10.1-16.9 |
| Educational level           |                      |         |      |           |
| Less than primary           | 314 (44)             | 30      | 10.4 | 6.8-15.6  |
| Primary                     | 260 (40)             | 38      | 13.8 | 9.5-19.6  |
| Secondary or higher         | 96 (16)              | 16      | 15.6 | 9.1-25.3  |
| Facility ownership          |                      |         |      |           |
| Public                      | 404 (45)             | 45      | 12.1 | 7.8-18.3  |
| Subsidized                  | 78 (9)               | 14      | 16.7 | 12.4-22.0 |
| Private                     | 251 (47)             | 31      | 12.0 | 8.4-16.8  |
| Facility size (no. of beds) |                      |         |      |           |
| < 100                       | 154 (28)             | 15      | 9.7  | 5.6-16.2  |
| 100–299                     | 283 (39)             | 35      | 12.5 | 8.9-17.4  |
| ≥ 300                       | 296 (33)             | 40      | 14.7 | 9.7-21.7  |
| Length of stay (years)      |                      |         |      |           |
| 0-2                         | 255 (36)             | 28      | 10.9 | 7.6-15.3  |
| 3-5                         | 214 (31)             | 26      | 13.7 | 8.8-20.6  |
| ≥ 6                         | 230 (33)             | 33      | 14.2 | 9.5-20.7  |
| No. of chronic conditions   |                      |         |      |           |
| 0-1                         | 149 (20)             | 4       | 2.1  | 0.6-7.0   |
| 2-3                         | 308 (42)             | 34      | 10.6 | 7.0-15.6  |

|                                 |          |    |      |           |
|---------------------------------|----------|----|------|-----------|
| ≥ 4                             | 276 (37) | 52 | 20.1 | 15.8-25.2 |
| No. of medications              |          |    |      |           |
| 0-2                             | 186 (26) | 8  | 3.9  | 1.7-8.4   |
| 3-4                             | 330 (47) | 36 | 10.9 | 7.6-15.2  |
| ≥ 5                             | 189 (27) | 44 | 24.2 | 18.2-31.5 |
| Antidepressant use              |          |    |      |           |
| No                              | 648 (89) | 69 | 10.4 | 7.9-13.6  |
| Yes                             | 70 (11)  | 20 | 29.7 | 20.8-40.4 |
| Anxiolytic use                  |          |    |      |           |
| No                              | 567 (76) | 64 | 11.2 | 8.2-15.2  |
| Yes                             | 151 (24) | 25 | 16.7 | 10.8-24.8 |
| Hypnotic use                    |          |    |      |           |
| No                              | 642 (88) | 81 | 13.1 | 10.0-16.9 |
| Yes                             | 76 (12)  | 8  | 8.2  | 3.7-17.3  |
| Antipsychotic use               |          |    |      |           |
| No                              | 633 (87) | 76 | 12.1 | 9.1-15.7  |
| Yes                             | 85 (13)  | 13 | 15.4 | 8.1-27.3  |
| Functional dependence           |          |    |      |           |
| Independent (100 <sup>b</sup> ) | 186 (22) | 12 | 6.1  | 2.8-13.0  |
| Mild (91-99)                    | 177 (25) | 15 | 8.4  | 4.4-15.5  |
| Moderate (61-90)                | 152 (23) | 25 | 15.9 | 10.9-22.6 |
| Severe (21-60)                  | 91 (15)  | 25 | 25.2 | 17.0-35.6 |
| Total (0-20)                    | 109 (16) | 11 | 10.7 | 6.3-17.5  |
| Use of cane                     |          |    |      |           |
| No                              | 516 (74) | 58 | 11.2 | 8.4-14.8  |
| Yes                             | 204 (26) | 30 | 15.6 | 10.7-22.3 |
| Use of walker                   |          |    |      |           |
| No                              | 644 (90) | 71 | 11.2 | 8.6-14.5  |
| Yes                             | 67 (10)  | 16 | 22.9 | 13.9-35.3 |
| Physical restraint              |          |    |      |           |
| No                              | 587 (81) | 69 | 12.0 | 8.7-16.3  |
| Yes                             | 122 (19) | 19 | 14.2 | 9.2-21.4  |
| Urinary incontinence            |          |    |      |           |
| No                              | 344 (46) | 23 | 6.8  | 4.3-10.8  |
| Yes                             | 365 (54) | 61 | 16.7 | 12.8-21.6 |

|                                  |          |    |      |           |
|----------------------------------|----------|----|------|-----------|
| Behavioral problems              |          |    |      |           |
| No                               | 625 (85) | 72 | 11.6 | 8.6-15.5  |
| Yes                              | 108 (15) | 18 | 17.1 | 10.9-25.8 |
| Cognitive status <sup>c</sup>    |          |    |      |           |
| Normal ( $\leq 2$ <sup>d</sup> ) | 269 (54) | 39 | 11.4 | 6.6-16.2  |
| Mild (3-4)                       | 65 (14)  | 10 | 14.4 | 6.2-22.6  |
| Moderate (5-7)                   | 60 (15)  | 8  | 12.5 | 5.6-19.3  |
| Severe ( $\geq 8$ )              | 60 (17)  | 9  | 16.6 | 8.7-24.5  |
| Vision impairment                |          |    |      |           |
| No/mild                          | 570 (87) | 60 | 11.1 | 8.3-14.6  |
| Moderate/severe                  | 84 (13)  | 16 | 17.9 | 11.1-27.5 |
| Hearing impairment               |          |    |      |           |
| No/mild                          | 549 (86) | 61 | 11.2 | 8.3-15.0  |
| Moderate/severe                  | 92 (14)  | 13 | 14.5 | 7.4-26.4  |
| Insomnia                         |          |    |      |           |
| No                               | 491 (69) | 55 | 11.5 | 8.4-15.5  |
| Yes                              | 222 (31) | 33 | 15.4 | 10.7-21.6 |
| Self-rated health                |          |    |      |           |
| Very good/good                   | 354 (56) | 34 | 10.2 | 6.8-15.0  |
| Fair/poor/very poor              | 298 (44) | 47 | 15.8 | 12.1-20.4 |
| Physician-rated health           |          |    |      |           |
| Very good/good                   | 382 (53) | 25 | 7.6  | 5.0-11.4  |
| Fair/poor/very poor              | 232 (47) | 64 | 18.2 | 14.2-23.0 |
| Depressive symptoms (GDS score)  |          |    |      |           |
| Normal (0-3)                     | 424 (68) | 40 | 9.8  | 6.5-14.7  |
| Moderate (4-7)                   | 158 (27) | 27 | 16.5 | 11.0-24.0 |
| Severe (8-10)                    | 35 (6)   | 8  | 26.6 | 14.5-43.6 |

*Abbreviations:* CI = confidence interval; GDS = Geriatric Depression Scale.

<sup>a</sup> Unweighted counts and weighted percentages.

<sup>b</sup> Barthel Index score.

<sup>c</sup> Empirical number of observations and weighted percentages computed through multiple imputation.

<sup>d</sup> Pfeiffer's Short Portable Mental Status Questionnaire score.
